# Supplementary material for: Highly efficient phosphorescent organic light-emitting diodes based on novel bipolar iridium complexes with easily-tuned emission colors by adjusting fluorine substitution on phenylpyridine ligands
Source: Royal Society of Chemistry journal article supplement (doi:10.1039/d1tc01498f), 2021-01-01
Supplement: d1tc01498f1.pdf [file d1tc01498f1.pdf]

## Supporting Information

### Highly Efficient Phosphorescent Organic Light-Emitting Diodes Based on Novel Bipolar Iridium Complexes with Easily-Tuned Emission Colors by Adjusting Fluorine Substitution on Phenylpyridine Ligands

Shuonan Chen,<sup>a</sup> Xi Gai,<sup>a</sup> Jie Liang,<sup>\*b</sup> Kaiqi Ye,<sup>a</sup> Yu Liu<sup>\*a</sup> and Yue Wang<sup>a</sup>

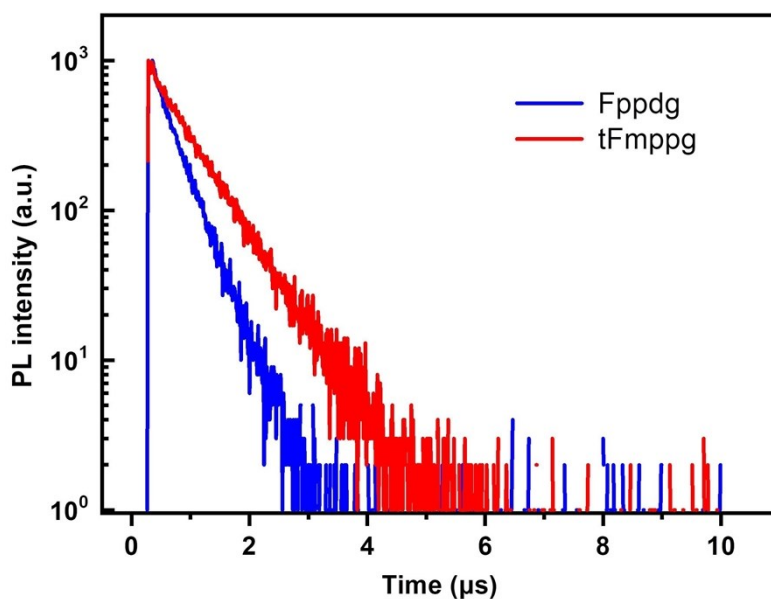

**S-Fig.** Transient PL spectra of Fppdg and tFmppdg.

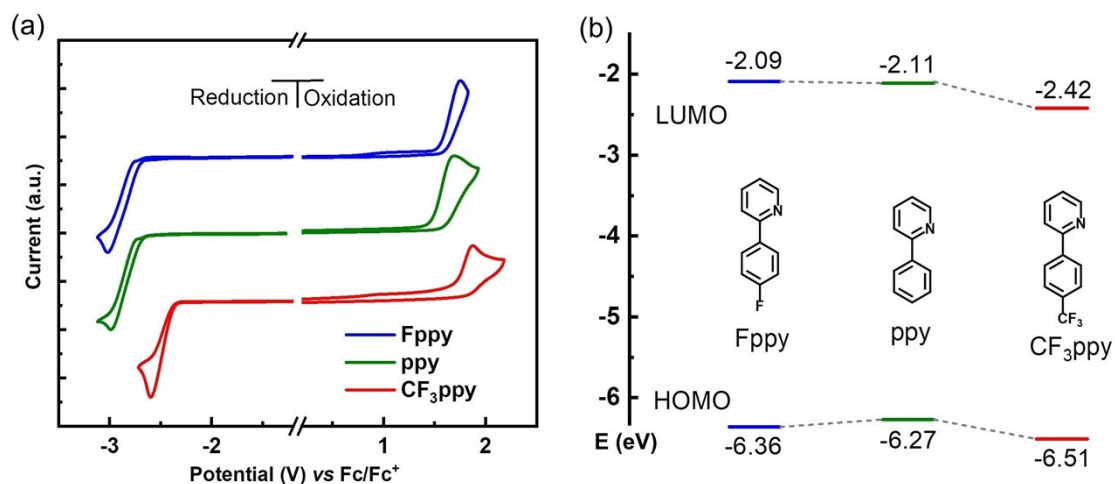

**S-Fig. 2** Cyclic voltammograms of three ppy derivative-based ligands recorded versus Fc<sup>+</sup>/Fc in newly distilled ACN solution for the reduction/oxidation scan (scan rate=100mV s<sup>-1</sup>) **(a)** and the corresponding estimated HOMO/LUMO levels **(b)**.
